# Supplementary material
Source: HighWire-hosted journal article supplement (https://www.cmajopen.ca/highwire/filestream/81199/field_highwire_adjunct_files/1/original-submission.pdf)
Supplement: original-submission.pdf [file original-submission.pdf]

1  
2  
3 **Systematic review: The evidence for whether neckties cause healthcare-associated**  
4 **infections**  
5

6 Pia Pace-Asciak, MD, FRCSC  
7 Sanjiv Kumar, DM, FRCS  
8 Frederick K. Kozak, MD, FRCSC  
9 Brian D. Westerberg, MD, FRCSC  
10  
11

12 Affiliations:  
13 Division of Otolaryngology-Head and Neck Surgery, University of British Columbia  
14  
15

16  
17 Corresponding Author:  
18 Brian D. Westerberg, MD  
19 BC Rotary Hearing and Balance Centre at St. Paul's Hospital  
20 Providence 2  
21 1081 Burrard St.  
22 Vancouver, B.C. Canada V6Z 1Y6  
23 Email: [BWesterberg@providencehealth.bc.ca](mailto:BWesterberg@providencehealth.bc.ca)  
24 Fax: +1 (604) 806-8777  
25  
26

27  
28 Declaration: We have no financial disclosures to make. We have no conflicts of interest.  
29  
30  
31  
32  
33  
34  
35  
36  
37  
38  
39  
40  
41  
42  
43  
44  
45  
46  
47  
48  
49  
50  
51  
52  
53  
54  
55  
56  
57  
58  
59  
60

## Abstract

**Background:** There is growing concern that neckties worn by physicians may contribute to healthcare-associated infections (HAI). As a result, UK hospitals adopted a tie-less dress-code policy. We evaluated the evidence for HAI resulting from physicians wearing neckties and whether the evidence is sufficient to warrant a similar tie-less policy in Canada.

**Methods:** A systematic review was performed to determine if neckties worn by physicians colonize harmful pathogenic bacteria and whether neckties contribute to the spread of infection to patients in the inpatient or outpatient setting. PubMed (1966 to 2017) and EMBASE (1980 to 2017) databases were searched. The level of evidence was appraised according to the Oxford Center for evidence based medicine. The quality of evidence and risk of bias was evaluated according to the Jadad scale or the NewCastle Ottawa scale.

**Results:** 1675 citations were screened; six articles were ultimately included. There was only one level 1B study. Neckties were more likely to colonize bacteria compared to shirt pockets. Limited evidence exists that neckties may be contaminated with pathogenic (*MRSA*) bacteria, and very limited evidence that contaminated neckties may transmit bacteria (in a controlled experimental setting to a mannequin).

**Interpretation:** There is no evidence of increased rate of healthcare-associated infections related to male physicians wearing a necktie. There is weak evidence that neckties are contaminated with pathogenic (and nonpathogenic) bacteria. The level of evidence was weak, the studies heterogeneous. Evidence to support the need for a tie-less dress code policy is lacking.

## Introduction

Healthcare workers, patients and visitors are estimated to be responsible for spreading approximately 80% of common healthcare-associated infections (HAI) (1). The overall annual direct medical cost to U.S. hospitals of healthcare-associated infections (HAI) has been estimated to range between U.S. \$28.4 and \$45 billion. Using estimates of the effectiveness of possible infection control interventions, the predicted benefits of prevention of HAI range between \$5.7 and \$31.5 billion (2). There is no reason to expect the proportional costs in Canada to be different. More than 200,000 patients get infections annually while receiving healthcare in Canada and more than 8,000 of these patients die as a result of these infections (1).

The World Health Care Organization (WHO) acknowledges that this is a worldwide problem. In order to reduce HAI rates, the proper infrastructure and guidelines within hospitals needs to be in place to ensure that enough attention is paid to hygiene with proper training of healthcare workers and sterilization of equipment so modern healthcare treatment is possible (3).

Concerned that certain work attire worn by physicians may be a potential vector responsible for increasing the incidence of healthcare-associated infections, the United Kingdom Department of Health introduced a Uniforms and Workwear dress code for National Health Service (NHS) employees in 2007 (4). This policy has since become known as the “bare below the elbow” attire policy as a means for reducing the spread of nosocomial infections. It has made recommendations that NHS staff wear short sleeves,

1  
2  
3 and avoid unnecessary jewelry and garments such as neckties when carrying out clinical  
4  
5 activities.  
6  
7  
8  
9

10 If indeed a physician who wears a necktie increases the risk of a patient acquiring a  
11  
12 healthcare-associated infection, then such a policy restricting their use by health care  
13  
14 professionals in Canada (and elsewhere) would be warranted. We performed a  
15  
16 systematic review of the published literature to measure the evidence that a health care  
17  
18 professional who wears a necktie colonizes harmful pathogenic bacteria, and whether this  
19  
20 contributes to the spread of infection to their patients.  
21  
22  
23  
24  
25

## 26 **Methods**

### 27 **Search strategy:**

28  
29 A systematic review was performed according to the PRISMA guidelines (5). We  
30  
31 searched PubMed (1966 to November 7, 2017) and EMBASE (1980 to November 7,  
32  
33 2017) databases using *a priori* determined search strategy. A senior librarian from the  
34  
35 College of Physicians and Surgeons of B.C. Medical Library was consulted to assist with  
36  
37 the literature searches.  
38  
39  
40  
41  
42  
43

44 Our objective was to determine if neckties worn by physicians colonize harmful  
45  
46 pathogenic bacteria and whether neckties contribute to the spread of infection to patients  
47  
48 in the inpatient or outpatient setting.  
49  
50  
51  
52  
53  
54  
55  
56  
57  
58  
59  
60

1  
2  
3 The literature search identified a main database of articles using the following search  
4 strategy (Appendix):  
5

6 (“infection”[MESH] OR “communicable diseases”[MESH] OR infect\* OR  
7 communicable\*) AND (“health personnel”[MESH] OR “physicians”[MESH] OR  
8 physician\* OR doctors OR doctor) AND (“clothing”[MESH] OR “attire”[All Fields] OR  
9 necktie\*)  
10  
11  
12  
13  
14  
15  
16  
17  
18

19 We included papers that were primary studies that examined neckties; editorials and  
20 letters were excluded although their references, if any, would be reviewed. The search  
21 was limited to articles in humans and those published in English. Articles examining  
22 potential vectors such as identification badges, stethoscopes and bow ties were excluded  
23 unless the comparison was against neckties.  
24  
25  
26  
27  
28  
29  
30  
31  
32

### 33 **Study selection, quality assessment and data extraction:**

34  
35 Two authors (P.PA and S.K) independently conducted individual reviews of titles and  
36 abstracts identified in the literature search. Duplicates were removed using RefWorks.  
37  
38 Discrepancies were resolved by discussion via review of the data and mutual consensus.  
39  
40 Data was extracted by the same two individuals who conducted the study selection to  
41 ensure consistency of reporting. Discrepancies were handled in a similar manner as study  
42 identification. The information we extracted from the papers that met our inclusion  
43  
44 criteria were: the type of study design, the number of patients, the number and specialty  
45  
46 of the health care workers wearing the tie, the isolated bacteria, the comparison made, the  
47  
48  
49  
50  
51  
52  
53  
54  
55  
56  
57  
58  
59  
60

1  
2  
3 effect it had on the patient or the outcome, whether the study was conducted in an  
4  
5 outpatient or inpatient setting, and the level of evidence the article presented.  
6  
7  
8  
9

10 The Oxford Center of Evidence Based Medicine recommendations (6) (Table 1) were  
11 used to assist in grading the level of evidence in the papers that fit our inclusion criteria.  
12  
13 We assessed the full text articles for study quality and risk of bias using the Jadad Scale  
14 (7) as well as the Newcastle-Ottawa Scale (NOS) (8). The Jadad scale is the most widely  
15 used scale to assess the quality as well as the risk of bias of clinical trials. It is a 5-point  
16 system that assesses the methods used in the clinical trial based on random assignment,  
17 double blinding and the flow of patients. The NOS scale is used to assess the quality  
18 including potential bias of nonrandomized trials. The greater the number of stars  
19 (maximum 9), the better the quality of the article.  
20  
21  
22  
23  
24  
25  
26  
27  
28  
29  
30  
31  
32

33 A meta-analysis was not possible given the heterogeneity of the study population, the  
34 small size of the studies, and the poor quality of the studies examined. Thus, given the  
35 paucity of the evidence, formal statistical analysis was not possible. Had the data been  
36 robust, a meta-analysis would have been performed.  
37  
38  
39  
40  
41  
42  
43  
44  
45  
46

#### 47 **Results:**

48  
49  
50

51 The initial search identified 1675 abstracts in PubMed and Embase. After duplicates were  
52 removed (257), 1418 abstracts remained. On screening, 1374 titles were excluded as not  
53  
54  
55  
56  
57  
58  
59  
60

1  
2  
3 relevant based on our inclusion and exclusion criteria. Forty-four full text articles  
4  
5 remained that were assessed for eligibility. Six articles were identified that satisfied our  
6  
7 inclusion criteria (Figure 1). No study specifically assessed the likelihood that wearing a  
8  
9 necktie would increase the risk of transmitting an infection to patients directly.  
10  
11

12  
13  
14 The highest quality paper (the only level 1B study, Jadad score was 3/5) (Table 2) was a  
15  
16 multicenter randomized blinded trial comparing the difference in contamination between  
17  
18 bowties versus neckties worn for three days by gynecologists and obstetricians. The  
19  
20 physicians were randomized but the main weakness of the study was the lack of mention  
21  
22 as to whether or not the investigators were blinded to the whether the bowtie or necktie  
23  
24 was worn first by the physician; the affect, if any, this may have had on the study results  
25  
26 in debateable. Overall, their results revealed no difference in contamination rates  
27  
28 between bowties and neckties, nor were any of the bacteria found contaminating either tie  
29  
30 thought to be “potentially highly pathogenic” (9).  
31  
32  
33  
34  
35  
36  
37

38 Three of the studies that met our inclusion criteria were level 3B (Table 2). Lopez et al. in  
39  
40 a prospective study found higher bacterial counts on neckties than on the front shirt  
41  
42 pockets of 50 doctors (25 surgeons and 25 physicians) (10). *Staphylococcus aureus* was  
43  
44 isolated from items of 16 doctors: 8 shirts (with counts ranging from 0 to 11) and 13 ties  
45  
46 (with counts ranging from 0 to 86). Of the 50 participants, the majority of physicians had  
47  
48 never cleaned their tie or could not remember when it was laundered last. Of those who  
49  
50 could recall (14 of 50 doctors), the mean time was 73 days since cleaning their tie  
51  
52 compared to less than two days for laundering their shirt (10). The NOS score assigned to  
53  
54  
55  
56  
57  
58  
59  
60

1  
2  
3 this study was 7/9, with a reasonable quality design. This paper fell short in reporting the  
4 adequacy of cohort follow up.  
5  
6  
7  
8  
9

10 In a cross-sectional study (level 3B), Koh et al found that neckties worn by doctors were  
11 more likely to be contaminated compared with neckties worn by preclinical medical  
12 undergraduates who were not involved in patient care (11). Of the physician neckties, 26  
13 of 50 were contaminated with *S.aureus* compared with 14 of 50 ties of preclinical  
14 medical students. Of those neckties positive for *S.aureus*, 16 physician neckties (62%)  
15 were identified as *MRSA* positive. None of the preclinical students' ties had *MRSA* and  
16 10 of 14 *S. aureus* specimens on the medical student ties were presumably coagulase  
17 negative (reported 4 of 14 coagulase positive). The assigned NOS score was 7/9.  
18  
19  
20  
21  
22  
23  
24  
25  
26  
27  
28  
29

30 In a case control study (level 3B), Pisipati et al investigated the likelihood of  
31 contamination with important pathogenic bacteria (*MRSA*) of new neckties and pens  
32 given to four urological surgeons each week for five consecutive weeks (12). Similar to  
33 the previous papers discussed, only common environmental contaminants were found in  
34 their controlled study and no "important pathogenic bacteria" were cultured on the ties or  
35 pens. Similarly, the assigned NOS score was 7/9.  
36  
37  
38  
39  
40  
41  
42  
43  
44  
45  
46

47 Weber et al found in their prospective experimental design (level 3B) that simulated  
48 patient encounters, wearing an unsecured tie was associated with more mannequins with  
49 bacterial contamination from physicians clothing compared with encounters where an  
50 unsecured tie was not worn (13). The assigned NOS score was 8/9.  
51  
52  
53  
54  
55  
56  
57  
58  
59  
60



1  
2  
3  
4  
5 In a cross sectional survey (level 4) with a study population of five neckties, growth of  
6 *coagulase negative staphylococcus* (CoNS) was reported from all five neckties of doctors  
7  
8 in the ICU. Heavy growth was found in 2 of 5 neckties with CoNS, *S. citreus* on 3 of 5  
9  
10 ties with heavy growth on one and “*bacillus*” species on one tie (14). These organisms  
11  
12 identified are not usually considered to be pathogenic in an immunocompetent patient.  
13  
14  
15  
16  
17  
18

19 **Interpretation:**  
20

21  
22  
23  
24 Healthcare-associated infections are associated with significant costs for patients and  
25  
26 society. Any preventative measures to decrease their occurrence would result in  
27  
28 significant decrease in patient morbidity and significant healthcare cost savings. Any  
29  
30 identifiable factor that could be modified to lower the risk of HAI should be addressed.  
31  
32  
33 There is evidence that neckties worn by physicians are often contaminated with  
34  
35 nonpathogenic bacteria commonly found on the skin and in the environment, as  
36  
37 presumably is any worn article of clothing. There is very limited evidence that neckties  
38  
39 may be contaminated more often with pathogenic (*MRSA*) bacteria, and very limited  
40  
41 evidence that contaminated neckties may transmit bacteria in a controlled experimental  
42  
43 setting (to a mannequin). Despite this, there is neither evidence that a healthcare  
44  
45 professional who wears a necktie is responsible for increased rate of healthcare-  
46  
47 associated infections nor that restricting healthcare professionals from wearing a necktie  
48  
49 will decrease the rate of occurrence of such infections. One may infer from one study  
50  
51 (Weber et al, level 3B study) that securing a necktie to avoid patient contact is advised,  
52  
53  
54  
55  
56  
57  
58  
59  
60

1  
2  
3 but there is limited evidence that contact of a necktie with a patient will lead to infection.  
4  
5 Future research is needed to look at whether neckties or other pendulous objects such as  
6  
7 stethoscopes, lanyard and so forth transmit or lead to infection in patients. With the  
8  
9 current evidence available, the likelihood that a necktie with any pathogen poses risk to a  
10  
11 patient is negligible.  
12  
13  
14  
15  
16  
17  
18

19 The UK bare below the elbow dress code policy has been openly questioned (15,16). The  
20  
21 lack of evidence is apparent. For instance, studies have found no difference in bacterial  
22  
23 colonization rates of hands between those observing the bare below the elbow policy and  
24  
25 those who did not (17). Nonetheless, the policy was updated in 2010 with comparable  
26  
27 recommendations (18). The updated policy similarly concluded it is considered poor  
28  
29 practice to, “wear neckties/lanyards (other than bow-ties) during direct patient care  
30  
31 activity. Ties have been shown to be contaminated by pathogens, and can accidentally  
32  
33 come into contact with patients. They are rarely laundered and play no part in patient  
34  
35 care.” Evidence supporting the recommendation against wearing of a tie is once again not  
36  
37 cited; instead it is referenced as ‘common sense’.  
38  
39  
40  
41  
42  
43  
44

45 Outbreak reports and observational studies looking at the dynamics of hand  
46  
47 contamination have shown an association between patient care activities that involve  
48  
49 direct patient contact and hand contamination (19). Regular hand washing has been  
50  
51 shown to reduce hospital-acquired infections. Some studies have shown, removal of rings  
52  
53 resulted in a decrease in frequency of hand carriage of pathogens before and after  
54  
55  
56  
57  
58  
59  
60

1  
2  
3 performing hand hygiene (19, 20). However, in a prospective study of 93 physicians,  
4  
5 Willis-Owen did not find a statistical difference in the number of colony forming units of  
6  
7 bacteria or in the presence of clinically significant organisms found when comparing  
8  
9 physicians who complied with the 'bare below the elbows' policy and those that did not  
10  
11 (17). Other 'pendulous fomites' that are worn by physicians such as stethoscopes and  
12  
13 identification badges have also been considered (22,23). Lanyards and identification  
14  
15 badges can carry pathogenic bacteria such as MRSA, MSSA, Enterococcus species and  
16  
17 gram-negative bacteria (23).  
18  
19  
20  
21  
22  
23

24 Although there is a lack of evidence confirming neckties are responsible for healthcare-  
25  
26 associated infections, sensibility should prevail. The Society of Healthcare Epidemiology  
27  
28 of America (SHEA) prudently recommends that rather than a ban on neckties, neckties  
29  
30 should be secured by a lab coat or a tie-clip to prevent the tie from coming into contact  
31  
32 with the patient (21). Similar logic should be applied to other 'pendulous fomites' that are  
33  
34 worn by physicians such as stethoscopes and identification badges (22,23).  
35  
36  
37  
38  
39

40 The symbolism behind health care apparel dates back to the early days of Florence  
41  
42 Nightingale when she advocated for the use of nursing uniforms so nurses would appear  
43  
44 more professional (21). Similarly, the necktie is an icon of male professionalism, and has  
45  
46 been worn by male physicians for over 100 years. Other clothing such as the white coat  
47  
48 has also been the most recognized symbol representing power and purity, dating back to  
49  
50 the 19<sup>th</sup> century when Lister was developing his concept of aseptic surgery (24).  
51  
52  
53  
54  
55  
56  
57  
58  
59  
60

1  
2  
3 In essence, dress codes play an important role in nurturing the patient-physician  
4 relationship and instilling confidence in patients that they are receiving the highest  
5 quality care. Studies have shown patients (76.3%) prefer their physician be clothed in  
6 professional attire, i.e. shirt, necktie, and white coat for a male physician and tailored  
7 trouser or skirt with white coat for female physicians. Respondents' trust, confidence and  
8 willingness to share personal information were greater for a physician in professional  
9 attire (25). Hence, recommendations against wearing of a necktie are not without  
10 consequences.  
11  
12  
13  
14  
15  
16  
17  
18  
19  
20  
21  
22  
23

24 One of the limitations of our study is that formal statistical analysis was not possible. The  
25 data available in the literature was heterogeneous and was evaluated qualitatively by  
26 validated methods versus quantitatively through meta-analysis. Secondly, our search set  
27 limits to literature published in English. However, none of the references cited in the  
28 'bare below the elbow study' were in languages other than English and in general,  
29 exclusion of non-English articles has been found not to have a significant impact on the  
30 results of systematic reviews.  
31  
32  
33  
34  
35  
36  
37  
38  
39  
40  
41  
42  
43

44 In summary, there is a lack of evidence to suggest that healthcare professionals wearing  
45 neckties contribute to a higher rate of healthcare-associated infections. The wearing of a  
46 necktie by a healthcare professional is a symbol evoking trust and confidence for a  
47 patient. Simple measures to avoid patient contact by the necktie seem prudent, but the  
48 available evidence does not support a nation-wide policy restricting their use. However,  
49 the data is sparse and a larger scale prospective study is required if concerns remain  
50  
51  
52  
53  
54  
55  
56  
57  
58  
59  
60

1  
2  
3 regarding the wearing of neckties before implementing a nation-wide policy against their  
4  
5 use in Canada.  
6  
7

8  
9 **Acknowledgement:**

10 The authors acknowledge the contributions of Karen MacDonell from the College of  
11 Physicians and Surgeons of B.C. Medical Library.  
12  
13  
14  
15  
16  
17  
18  
19  
20  
21  
22  
23  
24  
25  
26  
27  
28  
29  
30  
31  
32  
33  
34  
35  
36  
37  
38  
39  
40  
41  
42  
43  
44  
45  
46  
47  
48  
49  
50  
51  
52  
53  
54  
55  
56  
57  
58  
59  
60

Confidential

**References:**

1. <http://www.phac-aspc.gc.ca/cphorsphc-respcacsp/2013/infections-eng.php>. Accessed January 2017.
2. The Direct Medical costs of Healthcare-Associated Infections in U.S. Hospitals and the Benefits of Prevention. R. Douglas Scott II, Economist Division of Healthcare Quality Promotion National Center for Preparedness, Detection, and Control of Infectious Diseases Coordinating Center for Infectious Diseases Centers for Disease Control and Prevention March 2009. Available: <http://stacks.cdc.gov/view/cdc/11550>. (Accessed October 7, 2014).
3. [http://apps.who.int/iris/bitstream/10665/80135/1/9789241501507\\_eng.pdf](http://apps.who.int/iris/bitstream/10665/80135/1/9789241501507_eng.pdf)
4. Uniforms and Workwear. An evidence base for developing local policy. Department of Health, NHS. 17 September 2007. Available: [http://webarchive.nationalarchives.gov.uk/20130107105354/http://www.dh.gov.uk/prod\\_consum\\_dh/groups/dh\\_digitalassets/documents/digitalasset/dh\\_078435.pdf](http://webarchive.nationalarchives.gov.uk/20130107105354/http://www.dh.gov.uk/prod_consum_dh/groups/dh_digitalassets/documents/digitalasset/dh_078435.pdf). (Accessed October 5, 2014).
5. Liberati A. The PRISMA Statement for Reporting Systematic Reviews and Meta-Analyses of Studies That Evaluate Health Care Interventions: Explanation and Elaboration. *PLOS Medicine*. 2011:1–30.
6. The Center for evidence based medicine. Available: <http://www.cebm.net/?o=1025>.
7. Jadad, A.R.; Moore R.A., Carroll D., Jenkinson C., Reynolds D.J.M., Gavaghan D.J., McQuay H.J. (1996). Assessing the quality of reports of randomized clinical trials: Is blinding necessary? *Controlled Clinical Trials*. 1996 17 (1): 1–12.
8. [http://www.ohri.ca/programs/clinical\\_epidemiology/oxford.asp](http://www.ohri.ca/programs/clinical_epidemiology/oxford.asp)
9. Biljan et al. Multicenter randomised double blind crossover trial on contamination of conventional ties and bow ties in routine obstetric and gynecological practice. *British Medical Journal*. 1993; 307:1582-4.
10. Lopez P.J., Ron O., Parthasarathy P., Soothill J., Spitz L. Bacterial counts from hospital doctors' ties are higher than those from shirts. *American Journal of Infection Control*. 2009;37:79-80.
11. Koh K.C., Husni S., Tan J.E., Kunaseelan S., Nuriah S., Ong K.H., Morad Z. High prevalence of Methicillin-Resistant Staphylococcus aureus (MRSA) on doctors' neckties. *Medical Journal of Malaysia*. 64(3):233-5, 2009.
12. Pisipati S., Bassett D., Pearce I. Do neckties and pens act as vectors of hospital-acquired infections? *BJU International*. 2009; 1604-05.

- 1  
2  
3  
4  
5  
6  
7  
8  
9  
10  
11  
12  
13  
14  
15  
16  
17  
18  
19  
20  
21  
22  
23  
24  
25  
26  
27  
28  
29  
30  
31  
32  
33  
34  
35  
36  
37  
38  
39  
40  
41  
42  
43  
44  
45  
46  
47  
48  
49  
50  
51  
52  
53  
54  
55  
56  
57  
58  
59  
60
13. Weber et al. Prospective study on the effect of shirt sleeves and ties on the transmission of bacteria to patients. *The Journal of Hospital Infection.* 2012; 80:252-254.
  14. Dixon M. Neck ties as vectors for nosocomial infection. *Intensive Care Medicine.* 2000; 26:250.
  15. Bond L., Clamp P.J., Gray K., Van Dam V. Patients' perceptions of doctors' clothing: should we really be 'bare below the elbow'? *The Journal of Laryngology and Otology.* 2010; 1-4.
  16. Health Act 2006. Code of Practice for the prevention and control of healthcare associated infections. Uniforms and Workwear. An Evidence base for developing local policy. London: Department of Health, 2006.
  17. Willis-Owens, C.A., Subramanian P., Kumari P., Houlihan-Burne D. Effects of 'bare below the elbows' policy on hand contamination of 92 hospital sectors in a district general hospital. *Journal of Hospital infection.* 2010; 75:116-119.
  18. Uniforms and workwear: Guidance on uniform and workwear policies for NHS Employees. March 2010. Available: [http://webarchive.nationalarchives.gov.uk/20130107105354/http://www.dh.gov.uk/prod\\_consum\\_dh/groups/dh\\_digitalassets/@dh/@en/@ps/documents/digitalasset/dh\\_114754.pdf](http://webarchive.nationalarchives.gov.uk/20130107105354/http://www.dh.gov.uk/prod_consum_dh/groups/dh_digitalassets/@dh/@en/@ps/documents/digitalasset/dh_114754.pdf). (Accessed October 5, 2014).
  19. H. P. Loveday et al. Epic 3: National Evidence based guidelines for preventing health care associated infections in NHS hospitals in England. *Journal of Hospital Infection.* 86S1 (2014) S1–S70.
  20. Trick WE, Vernon MO, Hayes RA. Impact of ring wearing on hand contamination and comparison of hand hygiene agents in a hospital. *Clinical Infectious Diseases* 2003;36: 1383–1390.
  21. Bearman, Gonzalo; Bryant, Kristina; Leekha, Surbhi; Mayer, Jeanmarie; Munoz-Price, L. Silvia; Murthy, Rekha; Palmore, Tara; Rupp, Mark E.; White, Joshua. Healthcare Personnel Attire in Non-Operating-Room Settings. *Infection Control and Hospital Epidemiology*, Feb 2014;35 (2):107- 121.
  22. Breathnack A.S., Jenkins D.R., Pedler S.J. Stethoscopes as possible vectors of infection by staphylococci. *British Medical Journal.* 1992;305;1573-4.
  23. Kotsanas D., Scott C., E.Gillespie, Korman T.M., Stuart R.L. What's handing around your neck? Pathogenic bacteria on identity badges and lanyards. *Medical Journal of Australia.* 2008;1:7:5-8.

1  
2  
3 24. Blumhagen DW. The doctor's white coat. *Annals of Internal Medicine*. 1979; 91:111-  
4 16.

5  
6  
7  
8 25. Rehman S.U, Nietert P.J, Cope D.W. What to wear today? Effect of doctor's attire on  
9 the trust and confidence of patients. Anne Osborne Kilpatrick. *The American Journal of*  
10 *Medicine*. 2005;118:1279-1286.

11  
12 26. Pratt RJ, Pellowe C, Loveday HP, Robinson N, Smith GW, and the epic guideline  
13 development team; Barrett S, Davey P, Harper P, Loveday C, McDougall C, Mulhall A,  
14 Privett S, Smales C, Taylor L, Weller B, Wilcox M. The epic Project: Developing  
15 National Evidence-based Guidelines for Preventing Healthcare associated Infections.  
16 Phase 1: Guidelines for Preventing Hospital-acquired Infections. *Journal of Hospital*  
17 *Infection* 2001;47(Supplement): S1–S82.  
18  
19  
20  
21  
22  
23  
24  
25  
26  
27  
28  
29  
30  
31  
32  
33  
34  
35  
36  
37  
38  
39  
40  
41  
42  
43  
44  
45  
46  
47  
48  
49  
50  
51  
52  
53  
54  
55  
56  
57  
58  
59  
60

Confidential



## Appendix:

Search Strategy: (EMBASE 1974 to 2016 February 12)

| # | Searches                                                                                                                                                                                       | Results |
|---|------------------------------------------------------------------------------------------------------------------------------------------------------------------------------------------------|---------|
| 1 | exp infection/                                                                                                                                                                                 | 2830011 |
| 2 | exp communicable disease/                                                                                                                                                                      | 18419   |
| 3 | 1 or 2                                                                                                                                                                                         | 2830011 |
| 4 | exp health care personnel/or exp physician/or (physician* or doctor or doctors).mp.                                                                                                            | 1445557 |
| 5 | Exp clothing/ or (attire or necktie* or neck tie*).mp. (mp=title, abstract, heading word, drug trade name, original title, device manufacturer, drug manufacturer, device trade name, keyword] | 31434   |
| 6 | (infect* or communicable*).mp. or 3 [mp=title, abstract, heading word, drug trade name, original title, device manufacturer, drug manufacturer, device trade name, keyword]                    | 3356781 |
| 7 | 4 and 5 and 6                                                                                                                                                                                  | 1817    |
| 8 | Limit 7 to yr="2014 – current"                                                                                                                                                                 | 259     |
| 9 | Limit 8 to (human and English language)                                                                                                                                                        | 254     |

Figure 1: Outcome of search strategy in Medline and EMBASE

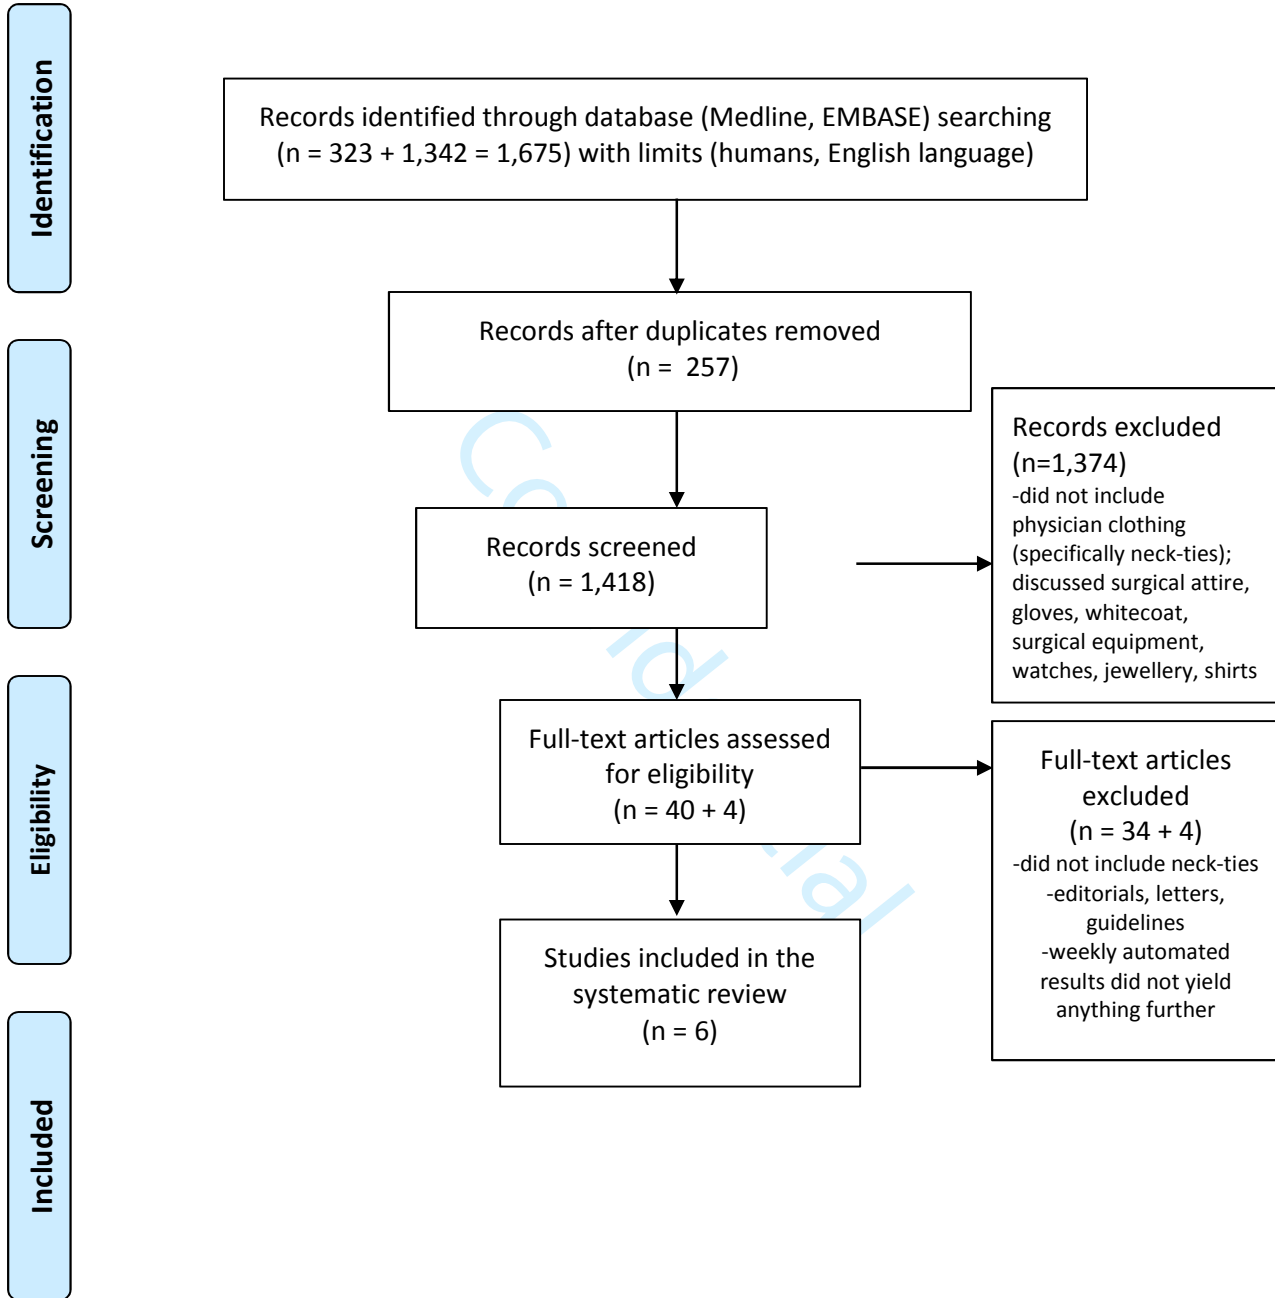

From: Moher D, Liberati A, Tetzlaff J, Altman DG, The PRISMA Group (2009). Preferred Reporting Items for Systematic Reviews and Meta-Analyses: The PRISMA Statement. PLoS Med 6(6): e1000097. doi:10.1371/journal.pmed1000097

For more information, visit [www.prisma-statement.org](http://www.prisma-statement.org).

For Peer Review Only

Table 1: The Oxford Center of Evidence Based Medicine - Levels of Evidence (italicized headings pertain to the current review).

| <b>Level of Evidence</b> | <b>Study Design</b>                            |
|--------------------------|------------------------------------------------|
| 1 A                      | Systematic Review of RCT                       |
| <i>1 B</i>               | <i>Randomized control trial</i>                |
| <i>1 C</i>               | <i>Case Series</i>                             |
| 2 A                      | Systematic Review of cohort studies            |
| <i>2 B</i>               | <i>Individual cohort study (retrospective)</i> |
| 2 C                      | Outcomes research/Ecological studies           |
| 3 A                      | Systematic Review of case control studies      |
| <i>3 B</i>               | <i>Individual case cohort study</i>            |
| <i>4</i>                 | <i>Case Series and case control studies</i>    |
| 5                        | Expert Opinion                                 |

Table 2: Summary of the six papers included in the systematic review. The level of evidence is assessed using the Oxford Level of Evidence criteria. The Jadad scale and NOS scale are used to assess the quality of evidence.

| <i>Author</i>              | <i>Design</i>                                                             | <i>Level of Evidence</i> | <i>Comparison</i>                                                                                                                  | <i>Outcome</i>                                                                             |
|----------------------------|---------------------------------------------------------------------------|--------------------------|------------------------------------------------------------------------------------------------------------------------------------|--------------------------------------------------------------------------------------------|
| Biljan et al., 1993 (9)    | Multicenter randomized double blinded crossover trial, prospective design | 1B<br><br>Jadad = 3/5    | Contamination of bowties vs. neckties in obs/gyne practice, N=15<br><br><a href="#">Outpatient hospital</a>                        | No difference in contamination by 3 <sup>rd</sup> day onwards                              |
| Lopez et al., 2009 (10)    | Cross sectional survey case control design                                | 3B<br><br>NOS = 7/9      | Contamination of neckties vs. front shirt pocket in 25 surgeons and 25 physicians, N=50<br><br><a href="#">Outpatient hospital</a> | Higher bacterial counts on neckties than on shirts                                         |
| Koh et al., 2009 (11)      | Cross Sectional survey, case control design                               | 3B<br><br>NOS = 7/9      | <i>MRSA</i> on neckties of medical staff vs preclinical medical students, N=100<br><br><a href="#">Outpatient hospital</a>         | Higher rate on physicians neckties vs. medical students of <i>S.aureus</i> and <i>MRSA</i> |
| Pisipati et al., 2009 (12) | Case controlled study, prospective                                        | 3B<br><br>NOS = 7/9      | Compare bacterial growth on neckties and pens worn by surgeons vs control, N=4<br><br><a href="#">Outpatient hospital</a>          | Common environmental bacteria were found                                                   |

**Comment [JT1]:** As requested, the references have been added adjacent to the authors.

**Comment [JT2]:** As per the editor's comment, #12 results, N for each study was included in the table.

**Comment [JT3]:** As requested by Dr.Schwandt comment #5 results, the setting of the research was listed according to what was described in the paper. It was divided into outpatient hospital setting type clinic versus inpatient setting which was the ICU in Dixon et al.

1  
2  
3  
4  
5  
6  
7  
8  
9  
10  
11  
12  
13  
14  
15  
16  
17  
18  
19  
20  
21  
22  
23  
24  
25  
26  
27  
28  
29  
30  
31  
32  
33  
34  
35  
36  
37  
38  
39  
40  
41  
42  
43  
44  
45  
46  
47

|                                         |                                                    |                     |                                                                                                                                                                                             |                                                                                                          |
|-----------------------------------------|----------------------------------------------------|---------------------|---------------------------------------------------------------------------------------------------------------------------------------------------------------------------------------------|----------------------------------------------------------------------------------------------------------|
| Weber et al., 2012 <a href="#">(13)</a> | Case controlled study, prospective                 | 3B<br><br>NOS = 8/9 | Compare the effect of sleeve length and wearing a necktie on the rate of transmission of bacteria from examiner to simulated patient (mannequin)<br><br><a href="#">Outpatient hospital</a> | Wearing an unsecured tie results in greater transmission, but sleeve length did not affect transmission. |
| Dixon et al., 2000 <a href="#">(14)</a> | Cross sectional survey<br>Case series, no controls | 4                   | Examine the type of bacteria on neckties of medical staff in the ICU, N=5<br><br><a href="#">Inpatient hospital</a>                                                                         | 5/5 CoNS<br>3/5 <i>S. citreus</i><br>1/5 " <i>bacillus species</i> "                                     |

Confidential

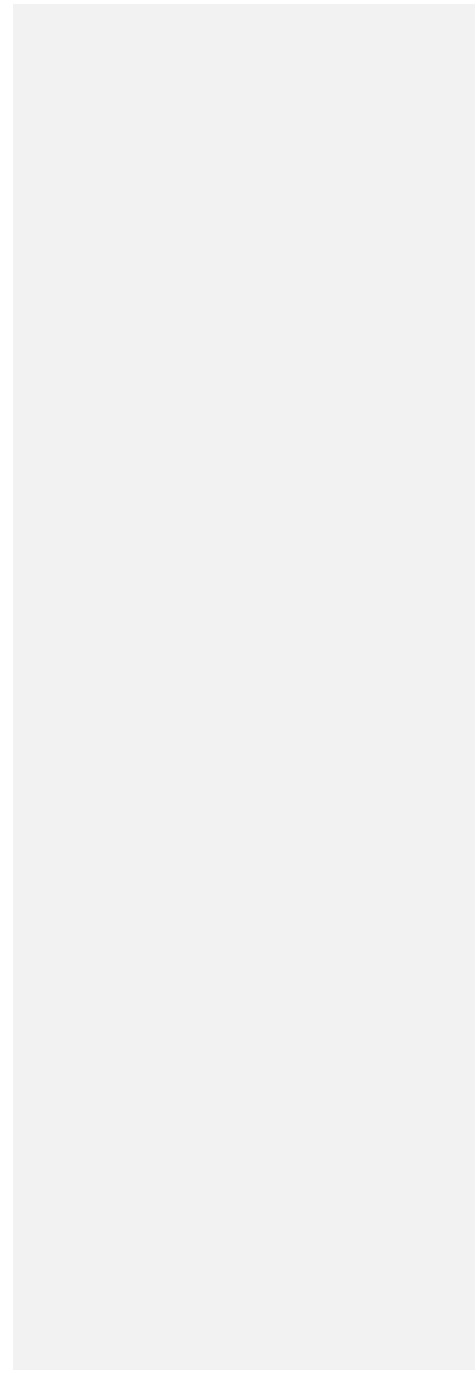

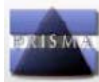

# PRISMA 2009 Checklist

1  
2  
3  
4  
5  
6  
7  
8  
9  
10  
11  
12  
13  
14  
15  
16  
17  
18  
19  
20  
21  
22  
23  
24  
25  
26  
27  
28  
29  
30  
31  
32  
33  
34  
35  
36  
37  
38  
39  
40  
41  
42  
43  
44  
45  
46  
47

| Section/topic                      | #  | Checklist item                                                                                                                                                                                                                                                                                              | Reported on page # |
|------------------------------------|----|-------------------------------------------------------------------------------------------------------------------------------------------------------------------------------------------------------------------------------------------------------------------------------------------------------------|--------------------|
| <b>TITLE</b>                       |    |                                                                                                                                                                                                                                                                                                             |                    |
| Title                              | 1  | Identify the report as a systematic review, meta-analysis, or both.                                                                                                                                                                                                                                         | 2, 5               |
| <b>ABSTRACT</b>                    |    |                                                                                                                                                                                                                                                                                                             |                    |
| Structured summary                 | 2  | Provide a structured summary including, as applicable: background; objectives; data sources; study eligibility criteria, participants, and interventions; study appraisal and synthesis methods; results; limitations; conclusions and implications of key findings; systematic review registration number. | 3                  |
| <b>INTRODUCTION</b>                |    |                                                                                                                                                                                                                                                                                                             |                    |
| Rationale                          | 3  | Describe the rationale for the review in the context of what is already known.                                                                                                                                                                                                                              | 4,5                |
| Objectives                         | 4  | Provide an explicit statement of questions being addressed with reference to participants, interventions, comparisons, outcomes, and study design (PICOS).                                                                                                                                                  | 3,5                |
| <b>METHODS</b>                     |    |                                                                                                                                                                                                                                                                                                             |                    |
| Protocol and registration          | 5  | Indicate if a review protocol exists, if and where it can be accessed (e.g., Web address), and, if available, provide registration information including registration number.                                                                                                                               | NA                 |
| Eligibility criteria               | 6  | Specify study characteristics (e.g., PICOS, length of follow-up) and report characteristics (e.g., years considered, language, publication status) used as criteria for eligibility, giving rationale.                                                                                                      | 3,5-7              |
| Information sources                | 7  | Describe all information sources (e.g., databases with dates of coverage, contact with study authors to identify additional studies) in the search and date last searched.                                                                                                                                  | 3, 5-7, 17         |
| Search                             | 8  | Present full electronic search strategy for at least one database, including any limits used, such that it could be repeated.                                                                                                                                                                               | 6,17               |
| Study selection                    | 9  | State the process for selecting studies (i.e., screening, eligibility, included in systematic review, and, if applicable, included in the meta-analysis).                                                                                                                                                   | 6                  |
| Data collection process            | 10 | Describe method of data extraction from reports (e.g., piloted forms, independently, in duplicate) and any processes for obtaining and confirming data from investigators.                                                                                                                                  | 6,7                |
| Data items                         | 11 | List and define all variables for which data were sought (e.g., PICOS, funding sources) and any assumptions and simplifications made.                                                                                                                                                                       | 6,7                |
| Risk of bias in individual studies | 12 | Describe methods used for assessing risk of bias of individual studies (including specification of whether this was done at the study or outcome level), and how this information is to be used in any data synthesis.                                                                                      | 6,7                |
| Summary measures                   | 13 | State the principal summary measures (e.g., risk ratio, difference in means).                                                                                                                                                                                                                               | 6,7                |
| Synthesis of results               | 14 | Describe the methods of handling data and combining results of studies, if done, including measures of consistency (e.g., $I^2$ ) for each meta-analysis.                                                                                                                                                   | 6,7                |

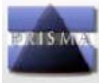

# PRISMA 2009 Checklist

| Section/topic                 | #  | Checklist item                                                                                                                                                                                           | Reported on page # |
|-------------------------------|----|----------------------------------------------------------------------------------------------------------------------------------------------------------------------------------------------------------|--------------------|
| Risk of bias across studies   | 15 | Specify any assessment of risk of bias that may affect the cumulative evidence (e.g., publication bias, selective reporting within studies).                                                             | 7                  |
| Additional analyses           | 16 | Describe methods of additional analyses (e.g., sensitivity or subgroup analyses, meta-regression), if done, indicating which were pre-specified.                                                         | 7                  |
| <b>RESULTS</b>                |    |                                                                                                                                                                                                          |                    |
| Study selection               | 17 | Give numbers of studies screened, assessed for eligibility, and included in the review, with reasons for exclusions at each stage, ideally with a flow diagram.                                          | Figure 1,7         |
| Study characteristics         | 18 | For each study, present characteristics for which data were extracted (e.g., study size, PICOS, follow-up period) and provide the citations.                                                             | 8,9                |
| Risk of bias within studies   | 19 | Present data on risk of bias of each study and, if available, any outcome level assessment (see item 12).                                                                                                | 8,9, table 2       |
| Results of individual studies | 20 | For all outcomes considered (benefits or harms), present, for each study: (a) simple summary data for each intervention group (b) effect estimates and confidence intervals, ideally with a forest plot. | table 2            |
| Synthesis of results          | 21 | Present results of each meta-analysis done, including confidence intervals and measures of consistency.                                                                                                  | NA                 |
| Risk of bias across studies   | 22 | Present results of any assessment of risk of bias across studies (see Item 15).                                                                                                                          | 8,9, table 2       |
| Additional analysis           | 23 | Give results of additional analyses, if done (e.g., sensitivity or subgroup analyses, meta-regression [see Item 16]).                                                                                    | NA                 |
| <b>DISCUSSION</b>             |    |                                                                                                                                                                                                          |                    |
| Summary of evidence           | 24 | Summarize the main findings including the strength of evidence for each main outcome; consider their relevance to key groups (e.g., healthcare providers, users, and policy makers).                     | 10, 11             |
| Limitations                   | 25 | Discuss limitations at study and outcome level (e.g., risk of bias), and at review-level (e.g., incomplete retrieval of identified research, reporting bias).                                            | 12                 |
| Conclusions                   | 26 | Provide a general interpretation of the results in the context of other evidence, and implications for future research.                                                                                  | 13                 |
| <b>FUNDING</b>                |    |                                                                                                                                                                                                          |                    |
| Funding                       | 27 | Describe sources of funding for the systematic review and other support (e.g., supply of data); role of funders for the systematic review.                                                               | 2,20               |

From: Moher D, Liberati A, Tetzlaff J, Altman DG, The PRISMA Group (2009). Preferred Reporting Items for Systematic Reviews and Meta-Analyses: The PRISMA Statement. PLoS Med 6(7): e1000097. doi:10.1371/journal.pmed1000097

For more information, visit: [www.prisma-statement.org](http://www.prisma-statement.org).
